# Supplementary material for: Effects of prolonged exposure to feedback delay on the qualitative subjective experience of virtual reality
Source: PubMed Central journal article supplement (PMC6200207; doi:10.1371/journal.pone.0205145), 2018-10-24
Supplement: pone.0205145.s001.pdf [file pone.0205145.s001.pdf]

### Adjusted questionnaire for ownership and agency in the Methods Test Experiment

| Category          | Questions                                                                                                                                                                                                                                                                                                                                                          |
|-------------------|--------------------------------------------------------------------------------------------------------------------------------------------------------------------------------------------------------------------------------------------------------------------------------------------------------------------------------------------------------------------|
| Ownership         | <ul style="list-style-type: none"> <li>. . . I felt as if I was looking at a tool in my own hand</li> <li>. . . I felt as if the red ball was part of my body</li> <li>. . . It seemed as if I were sensing the movement of my hand in the location where the red ball moved</li> <li>. . . I felt as if the red ball was attached to my hand</li> </ul>           |
| Ownership Control | <ul style="list-style-type: none"> <li>. . . I felt as if my real hand were turning rubbery</li> <li>. . . It seems as if I had more than one right hand</li> <li>. . . It appeared as if the red ball were drifting towards my real hand</li> <li>. . . It felt as if I had no longer a right hand, as if my right hand had disappeared</li> </ul>                |
| Agency            | <ul style="list-style-type: none"> <li>. . . The red ball moved just like I wanted it to, as if it was obeying my will</li> <li>. . . I felt as if I was controlling the movements of the red ball</li> <li>. . . I felt as if I was causing the movement I saw</li> <li>. . . Whenever I moved my hand I expected the red ball to move in the same way</li> </ul> |
| Agency Control    | <ul style="list-style-type: none"> <li>. . . I felt as if the red ball was controlling my will</li> <li>. . . I felt as if the red ball was controlling my movements</li> <li>. . . I could sense the movement from somewhere between my real hand and the red ball</li> <li>. . . It seemed as if the red ball had a will of its own</li> </ul>                   |

### Questions used in the scaling task in both experiments

| Category  | Questions                                                            |
|-----------|----------------------------------------------------------------------|
| Ownership | . . . how much did you feel like the 'avatar' was part of your body? |
| Agency    | . . . how much did it feel like you were in control of the 'avatar'? |
| Presence  | . . . How present did you feel in the virtual environment?           |
